# Supplementary material for: Effects of denitrification on the distributions of trace gas abundances in the polar regions: a model-data comparison
Source: Copernicus journal article supplement (doi:10.5194/egusphere-2022-1422), 2022-12-12
Supplement: Supplementary file 1 [file egusphere-2022-1422-supplement.pdf]

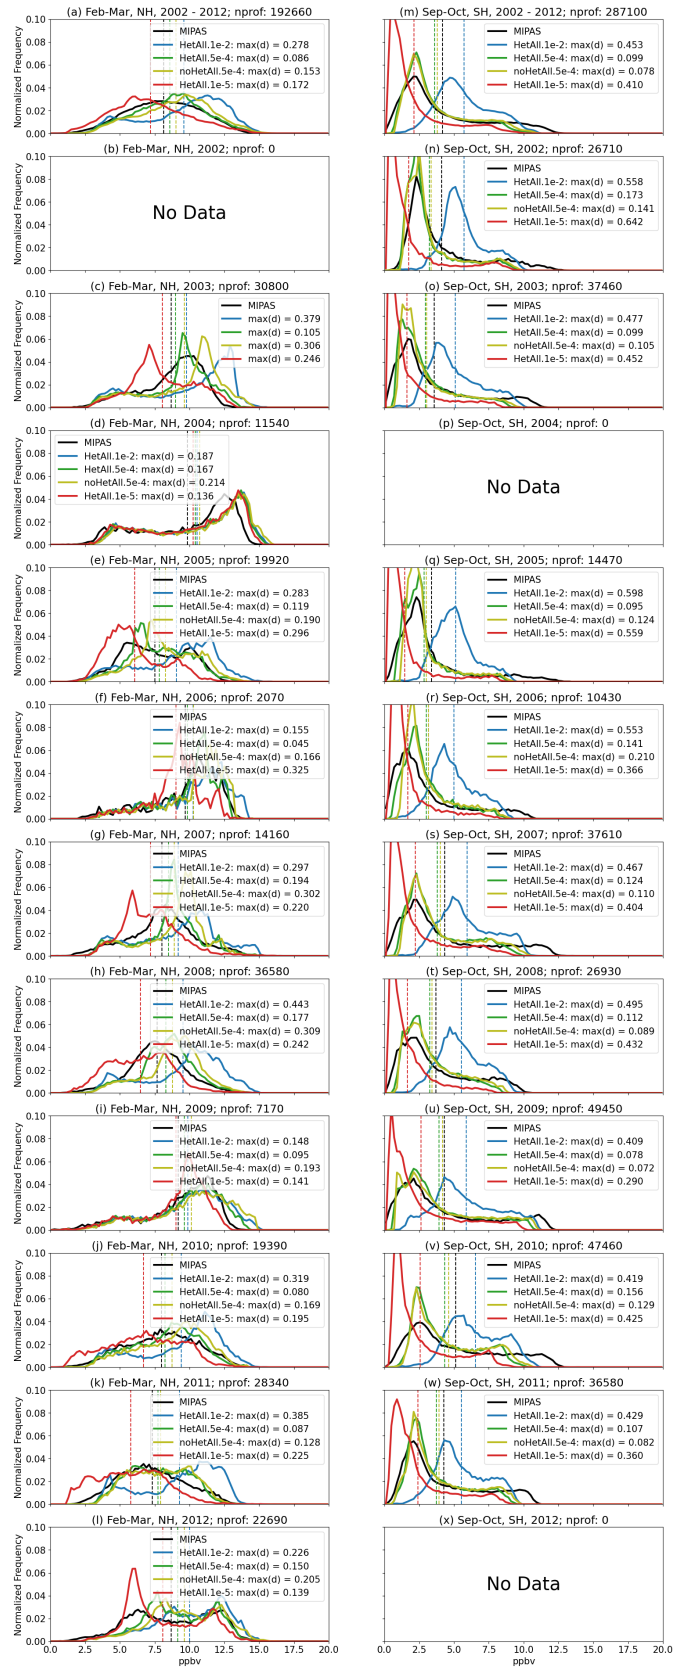

Figure S1. Same as Fig. 1 of the main manuscript, but showing all individual years.

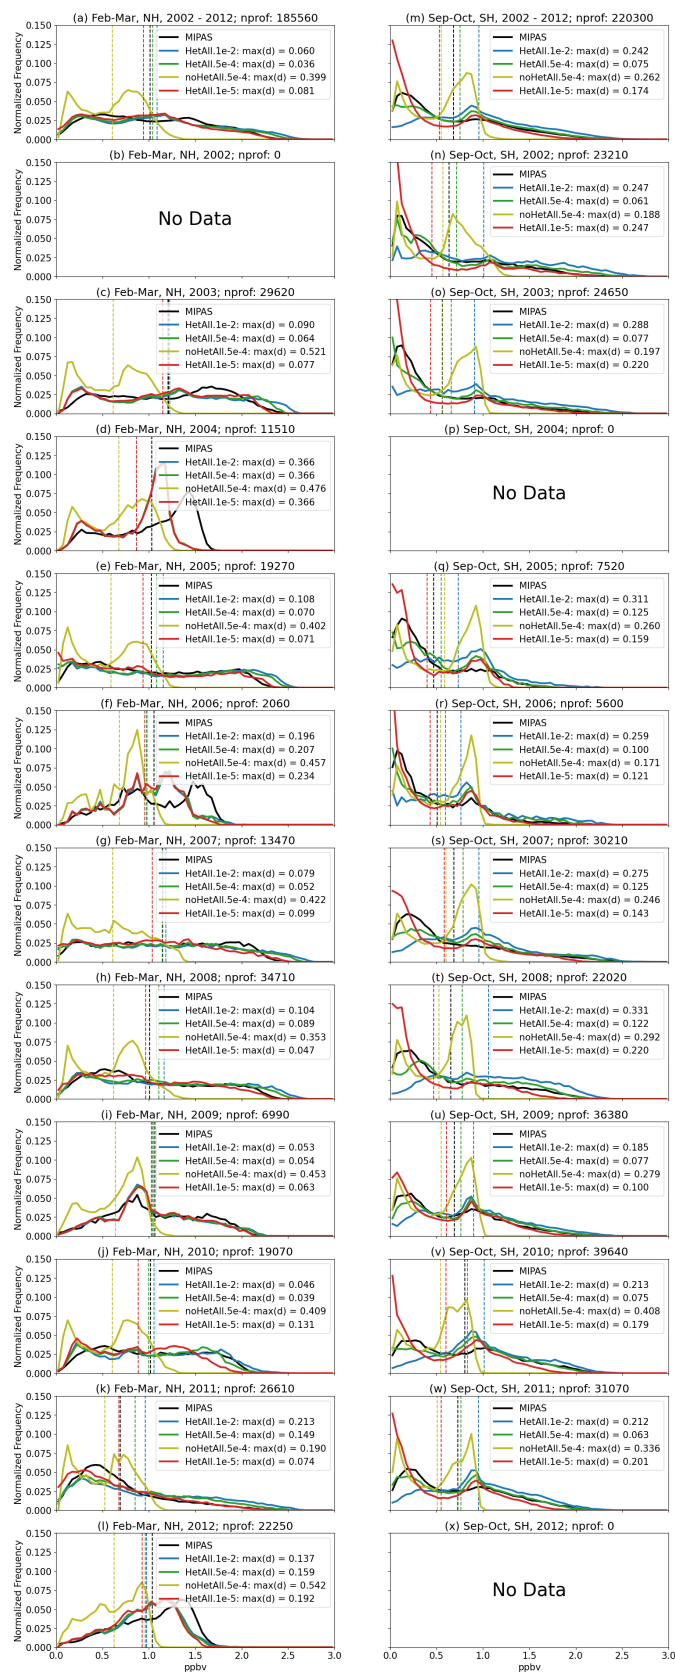

**Figure S2.** Same as Fig. 3 of the main manuscript, but showing all individual years.

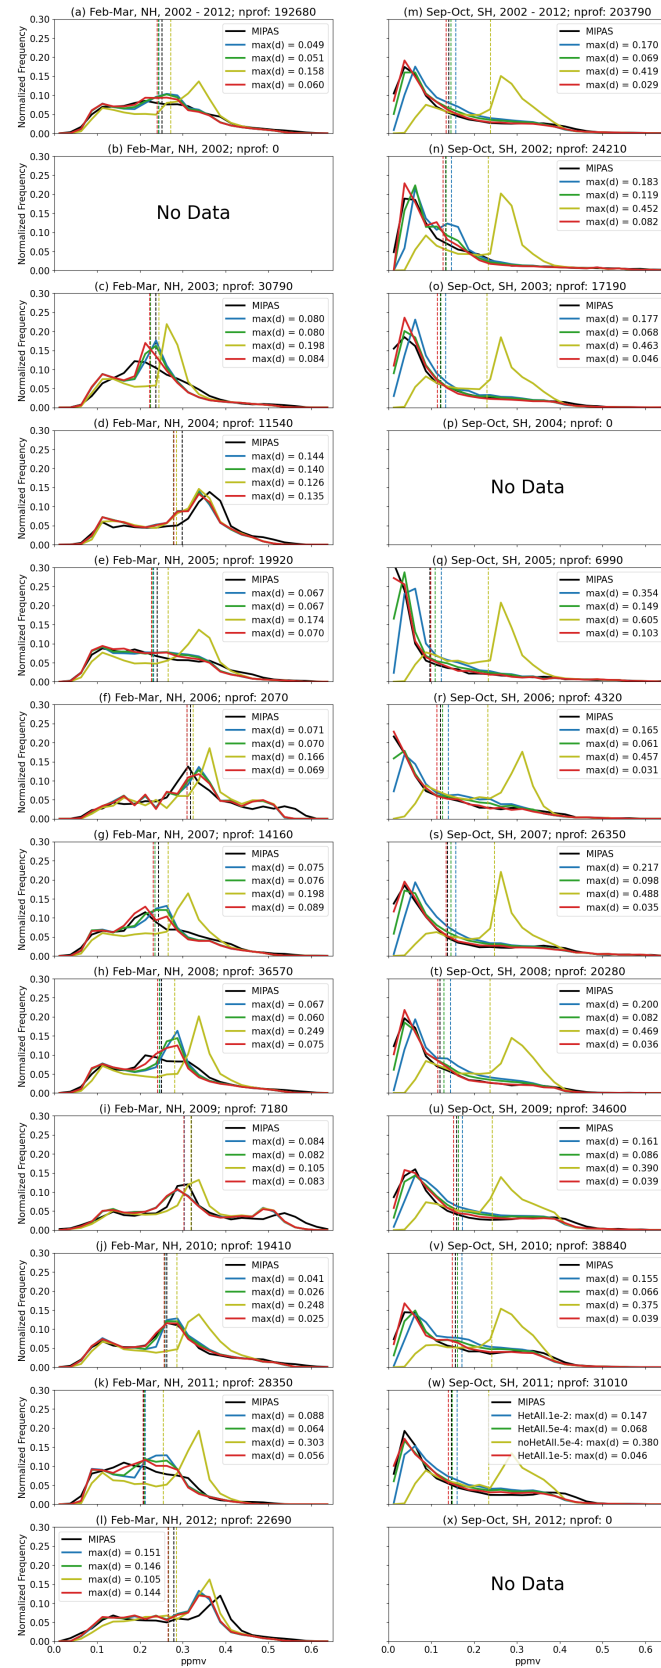

**Figure S3.** Same as Fig. 4 of the main manuscript, but showing all individual years.

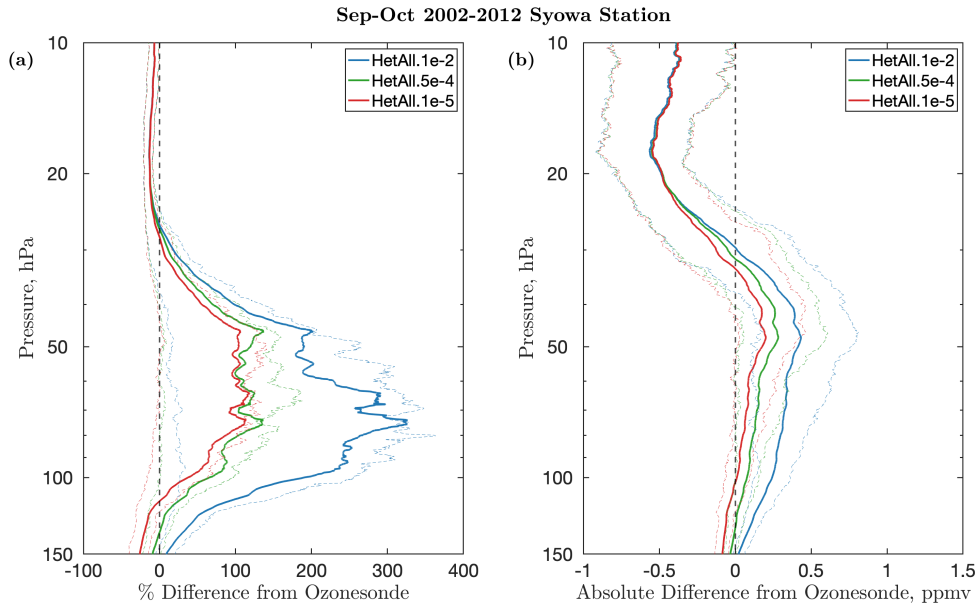

**Figure S4.** Same as Fig. 5 of the main manuscript, but showing Syowa Station without the noHetAll simulation.

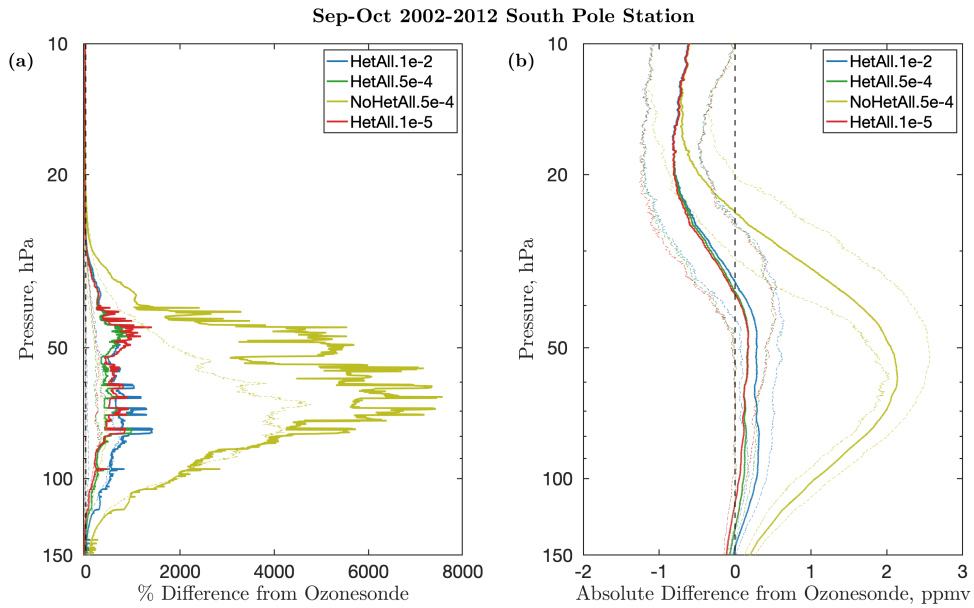

**Figure S5.** Same as Fig. 5 of the main manuscript, but showing South Pole Station.
