# Supplementary material for: Effects of denitrification on the distributions of trace gas abundances in the polar regions: a model-data comparison
Source: Copernicus journal article supplement (doi:10.5194/egusphere-2022-1422), 2022-12-12
Supplement: Supplementary file [file egusphere-2022-1422-AC1-supplement.pdf]

Dear Ingo Wohltmann,

Thank you very much for this detailed review of our manuscript. Your comments helped us to improve the manuscript and we hope that we could address all of your major concerns in the revised manuscript. Please find below our responses to each of your comments. Major changes include:

- We changed the title and included WACCM, as suggested in your first comment
- We added more information about the NAT parameterization in WACCM
- Some more information about the method how to calculate the max(d) values is provided in Sect. 2.2
- We added two new figures comparing MIPAS HNO<sub>3</sub> with WACCM as (1) a timeseries and (2) a scatter plot, see discussion below and in the revised manuscript

Thanks again for your review and on behalf of all authors,  
Michael Weimer

## 1 Specific Comments

**1.1 Title: This manuscript is specifically about the WACCM model. This should also be reflected in the title. Please add "WACCM" to the title in some way. For the same reason, you could also add that you use MIPAS data in the title.**

We agree that the manuscript is solely focussed on the WACCM model. As we're using observations other than MIPAS, we suggest changing the title to "Effects of denitrification on the distributions of trace gas abundances in the polar regions: a comparison of WACCM with observations".

1.2 Lines 38–40: ”Accounting for denitrification is an important process in chemistry-climate models, which is why many parametrizations with different levels of detail have been developed to account for the microphysics and sedimentation of NAT particles in these models (e.g., Wegner et al., 2013; Zhu et al., 2015; Kirner et al., 2011; Weimer et al., 2021).” I am a little bit surprised that you are talking only about chemistry-climate models (CCMs) here, and not about chemistry and transport models (CTMs). This is all the more surprising since you use the specified dynamics version of WACCM here (SD-WACCM), which is effectively a CTM. There are some obvious omissions in the citations that you give here. The first that comes to my mind is the implementation of denitrification into the CLaMS model by Grooß et al., doi:10.5194/acp-5-1437-2005 (there are also follow-up papers), which is based on the Lagrangian DLAPSE scheme (Carslaw et al., doi:10.1029/2001JD000467) that has also been used in other models. I probably have a small conflict of interest here, but if you like, you could also cite the implementation of DLAPSE into my model ATLAS, Wohltmann et al., doi:10.5194/gmd-3-585-2010. But surprisingly, you also don’t cite your own implementation. As far as I can figure out, the denitrification scheme in WACCM is based on the scheme described in Considine et al. (2000). Wouldn’t it make sense to cite that here? Wegner et al. does not exactly deal with the details of the denitrification scheme.

Thank you for this comment. We added some citations for CTMs and Considine et al. (2000) as well as others. Please note that WACCM is a chemistry-climate model which, in SD mode, is indeed depending on external meteorological data. The ratio between using MERRA2 and the internal WACCM meteorology in the configuration in this study is only 1/100, though, which means that the climatology is the same as in the reanalysis data but for shorter time scales it can be assumed to be free-running. Thus, we hesitate to consider WACCM as a CTM in any configuration.

- 1.3 Same topic: I would really like to see a short and concise account of the methods used to model denitrification in CCMs and CTMs here. This really is not required to be detailed or complicated, just a short overview. I think that would be helpful for the reader.**

We agree with this comment and added some sentences in the introduction pointing out the different approaches to parameterize NAT in the models.

- 1.4 Line 48: "... other datasets may also be appropriate but here we use MIPAS for this initial test". You probably anticipated a comment here and tried to avoid it by stating this. Nevertheless, I will give the comment here anyway ;-). There are some obvious additional candidates for comparison with measurements. The most obvious one is MLS, in particular since there is a much longer time series extending into the present.**

– and –

**Line 49 (and lines 11–12): If you would use other measurement sources than MIPAS, you could also show results for HCl here. HCl seems to be quite an obvious omission here.**

– and –

**Line 69: "Here we have had the benefit of the unusual NH year 2020" Exactly. But since you use MIPAS data here, which ends in 2012, you are not able to compare to just this winter, which could be relatively easily compensated for by using a different measurement data set like MLS.**

We agree that it would be beneficial to compare the WACCM simulations with other datasets, such as MLS, which are still in operation and would allow for comparisons of more recent seasons than with MIPAS and other trace gases. Speaking about MLS, however, the signal-to-noise ratio is not large enough to do comparisons to other datasets without averaging, as found for HCl e.g. by Wang et al., PNAS (2023), doi:10.1073/pnas.2213910120, but this is true for all species measured by MLS. Here, we analyze individual profiles and compare WACCM and the satellite data at these locations, so averaging is not possible which is why we selected MIPAS for this study. We already mention at the end of the manuscript that analysis with other datasets would be beneficial and added another sentence about this discussion here.

- 1.5 Line 64:** "... using a simple upwind scheme." I would add Considine et al. as a reference at the end of the sentence, since this is where it is actually described in detail.

We added this to the manuscript.

- 1.6 Same topic:** I think it wouldn't hurt to shortly describe how the denitrification scheme works, even if you repeat information from some older papers, since this is central for your study. I think this would help the reader, who is not required to gather this information from other papers then. This could give the reader an idea how microphysical processes as nucleation, sedimentation (fall velocities), growth and evaporation are handled here in a simplified fashion.

We added some more details about the NAT scheme in WACCM to Sect. 2.1.

- 1.7 Lines 67–68:** ". . . observed NAT particle abundances may therefore not be the best guide for this parameter choice." I agree, and will therefore not comment on this or other details of PSC measurements.

Thank you.

- 1.8 Line 71:** I think it would increase the insight of the reader in what is happening in your model greatly if you would mention that decreasing the NAT number density will increase the particle sizes and the fall velocities, and hence, the efficiency of denitrification. Maybe you mention that somewhere else in the paper and I missed it. This is under the caveat that I understand correctly how your denitrification scheme is working.

We added this information also to Sect. 2.1.

1.9 Line 90–93, 99, General approach with pdfs in the polar vortex in the altitude range 30–150 hPa: I understand the benefit and elegance of your approach to have a single and comprehensive metric (integrated difference of the WACCM and MIPAS pdfs) that you apply for improving your parameterization, but I think this very condensed metric may hide some important things. In particular, 30–150 hPa is a HUGE altitude range, where all kinds of parameters change significantly (pressure, partitioning of species, NAT threshold temperatures and so on). Isn't it a bit dangerous to throw everything into one pdf here? I think it is required that you at least go into SOME more detail here. That would not only allow more insight into what is actually happening, but may also help to improve the parameterization. E.g., I would really like to see a comparison of MIPAS and WACCM using an HNO<sub>3</sub> vortex mean profile that shows regions of denitrification and renitrification. This could also be done as a function of time and altitude for individual years. Or, since the two pdfs may agree although identical values are located at spatially very different locations (in altitude or horizontally), it would also be helpful to do some simple "sanity checking" and to provide some simple plots like contour plots of HNO<sub>3</sub> at a given altitude level for several dates (in different years).

We are aware that the pressure range shown in the figures is quite large, but as we already mention in the manuscript, we also analyzed sub-regions of the pressure range 30 to 150 hPa with similar results. In addition, the number concentration of NAT in the model under investigation here is set to one global value, but might vary spatio-temporally in reality. To get a general overview how to set this parameter, we decided that showing the whole pressure range is appropriate for the purpose of this study. In the revised manuscript, we analyzed the height-dependent HNO<sub>3</sub> in the vortex, which can be found in the new Fig. 1 showing that the height-dependent distribution is similar in the polar vortex, with smallest differences for HetAll.5e-4. We also added a scatter plot (new Fig. 2) including all profiles of all years showing that HetAll.5e-4 has a clear correlation to MIPAS whereas the simulations using different NAT number density have a larger spread. Please note that this includes the whole pressure range from 30 to 150 hPa. Therefore, smallest max(d) values for HetAll.5e-4 are

not just a coincidence, but they result from a better correlation at all altitudes, which supports our approach to use the whole pressure range in the PDFs.

**1.10 Line 100: "In order to make the datasets comparable, we remove the profiles from both WACCM and MIPAS data where negative values occur in the measurements." Does this significantly affect the results? If not (what I suspect), it may be worth noting. I write this comment because removing profiles with negative values from a noisy measurement data set can easily introduce a positive bias when e.g. applying a mean or looking at the pdf.**

Thank you for this comment. As we describe in the manuscript, output of the WACCM profiles is given at the locations closest to the MIPAS measurements. Since we remove these profiles from both WACCM and MIPAS, there should not be a systematic bias between them induced by that. We also added a sentence that this does not affect the results significantly.

**1.11 Line 115: Probably only when the ozone sonde measurement is inside the vortex? Might be worth noting.**

We excluded ozonesonde profiles outside the polar vortex from Fig. 7 in the revised manuscript and added this information to the methodology section 2.3 and to the figure caption.

**1.12 Line 118: Why these two years? Warm and cold NH winter?**

As can be seen in the supplement, all individual years show similar results in both hemispheres. Therefore, we showed two example years here. We added a reference to the supplement at this point in the manuscript and a short explanation at the start of Sect. 3 that these are example years.

**1.13 Line 126:** But I think it also shows that compared to the effects of denitrification, the effects of heterogeneous chemistry on HNO<sub>3</sub> are usually quite small. Might be worth noting. Would also be nice to have a citation for this, but since this is kind of textbook knowledge not often stated explicitly, it might be hard to find.

We added a sentence to the next paragraph explicitly describing this.

**1.14 Line 161:** "There is also a clear signature of heterogeneous chemistry in the ClONO<sub>2</sub> distributions." ... which I don't find surprising when you switch off the ClONO<sub>2</sub>+HCl activation reaction.

We agree with this comment, but we still think that it is worth noting. In addition, this is a nice example where the effect of heterogeneous chemistry can be clearly seen at the first glance.

**1.15 Line 161:** "ClONO<sub>2</sub> is formed faster in early spring than HCl" I don't really know what to make out of this sentence. Do you want to discuss the fact here, that depending on temperatures and hemispheres, chlorine deactivation is sometimes predominantly into HCl (SH, maybe cold NH winters) and sometimes predominantly into ClONO<sub>2</sub>? That effect will depend on the Cl/ClO ratio and hence on low or high ozone, and it will depend on denitrification.

– and –

**Line 163–164:** "ClONO<sub>2</sub> volume mixing ratios that are too low compared to MIPAS, it is notable that the maximum values are increased by about 1 ppbv and then are comparable to MIPAS in all simulations with heterogeneous chemistry." That's interesting. Switching off heterogeneous chemistry should impede activation of ClONO<sub>2</sub> into active chlorine and impede ozone depletion. But why does this seem to "cut off" the highest ClONO<sub>2</sub> values? Do you have an explanation? Seems not straightforward to me.

We agree that this statement is not true in this generality as it occurs in the manuscript. What we wanted to emphasize here is that the reaction ClO + NO<sub>2</sub>

is usually faster than  $\text{Cl} + \text{CH}_4$ , but only if  $\text{NO}_2$  is available and ozone VMRs are large enough (e.g. Solomon et al., JGR, 2015). The dependence on  $\text{NO}_2$  shows that this process depends on denitrification. At the edge regions of the polar vortex the well known  $\text{ClONO}_2$  “collar” occurs with  $\text{ClONO}_2$  VMRs bigger than before the winter because the  $\text{HCl}$  has been depleted by heterogeneous reactions. So, the bottom line is that the biggest values of  $\text{ClONO}_2$  also depend on the heterogeneous chemistry.

We added these details to the paragraph.

**1.16 Line 165–167: Now, I am confused. When switching off heterogenous chemistry, I would have expected MUCH higher ozone values (a few ppm). Am I misunderstanding something here completely or is there something going wrong here (e.g. the values at the x axis not being correct)? And the ozone values in the northern hemisphere seem to be suspiciously low in all cases. Values of below 0.3 ppm are normally never observed in this altitude range, even with ozone depletion. I have the impression that something is clearly going wrong here.**

Thank you for pointing this out. We had an error of one order of magnitude when converting the volume mixing ratios to ppmv. The fixed figures can be found in the revised version of the manuscript (and supplement). We also corrected the connected numbers in the text of the manuscript.

**1.17 Lines 168 and following: Why don’t you compare to ozone from MIPAS here? Would somehow be consistent to the rest of the manuscript. I would also find it interesting not only to see the differences, but also the mean ozone profiles.**

We decided to show profiles of ozonesondes because the precision of the single (in-situ) measurement is better than for satellite measurements. We added the mean profiles as panels to Fig. 7 in the revised manuscript and the figures in the supplement.



**1.18 Lines 207–208: Isn't it a little bit over the top to argue with the Kolmogorov- Smirnov test here when it can be easily seen from the figures that the distributions are still different? I think that could be shortened.**

Zambri et al. (2021) use a similar approach as in this study, but compare the PDFs with the K-S test which is why we would like to keep this statement in the manuscript. We added to this sentence that they use a similar approach in the revised manuscript to make this clearer.

**1.19 Supplement: I think it wouldn't hurt to mention what species you are showing in the plots. In the moment, you can only deduce that from the figure numbers in the main manuscript given in the caption.**

We added the species name to the figure captions.

## **2 Technical corrections**

### **2.1 Line 124: Typo "cpmpared"**

Corrected.
